# Supplementary material for: A highly efficient deep red-emitting Mn4+-powered oxyfluoride nanophosphor developed for plant growth and optical thermometric applications
Source: Royal Society of Chemistry journal article supplement (doi:10.1039/d4nr00787e), 2024-01-01
Supplement: d4nr00787e1.pdf [file d4nr00787e1.pdf]

## Supplementary

# Highly efficient deep red-emitting Mn<sup>4+</sup>-powered oxyfluoride nanophosphor classified for plant growth and optical thermometric applications

**Malini Abraham<sup>a, d</sup>, Jatin Dhanuka<sup>b</sup>, Sudipta Som<sup>b, \*</sup>, Mukesh K Pandey<sup>c</sup>,  
Subrata Das<sup>a, d, \*</sup>**

<sup>a</sup> Materials Science and Technology Division, CSIR-National Institute for  
Interdisciplinary Science and Technology, Thiruvananthapuram, Kerala  
695019, India

<sup>b</sup> School of Science and Humanities, Shiv Nadar University Chennai,  
Kalavakkam, Tamil Nadu 603110, India

<sup>c</sup> Department of Physics, National Taiwan University, Taipei 10617, Taiwan

<sup>d</sup> Academy of Scientific and Innovative Research (AcSIR), Ghaziabad-201002,  
India

\*E-mails: [sudiptasom@snuhennai.edu.in](mailto:sudiptasom@snuhennai.edu.in) (S. Som), [subratadas@niist.res.in](mailto:subratadas@niist.res.in) (S. Das)

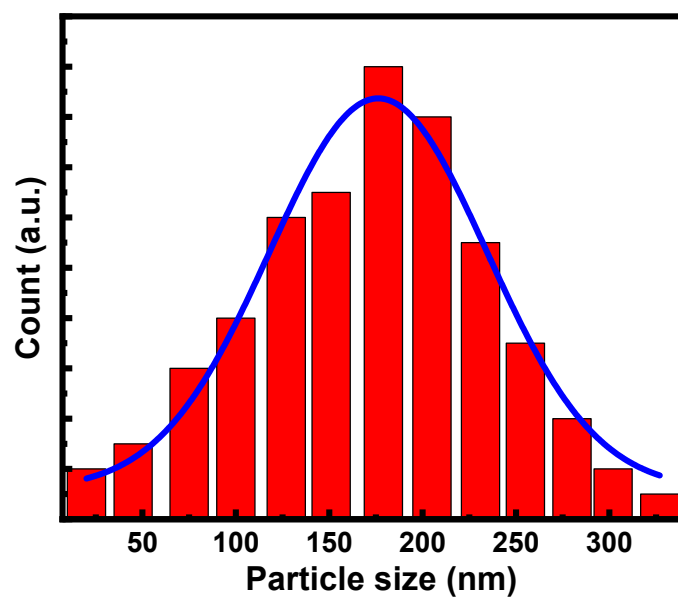

*Fig. S1* Partcile size distribution diagram of MGOF: Mn<sup>4+</sup> phosphor

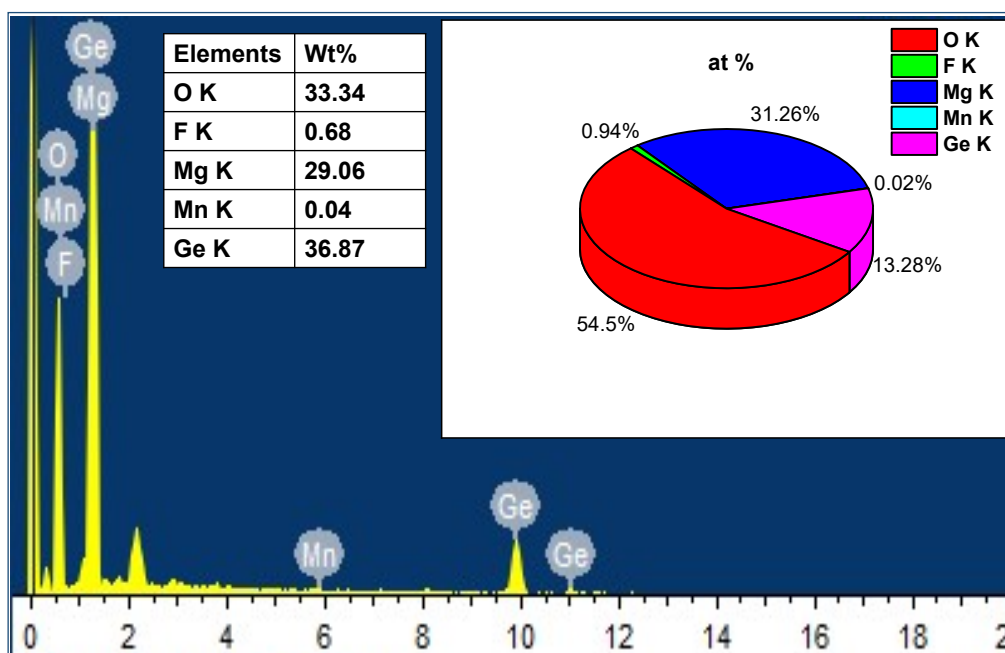

*Fig. S2* Energy dispersive X-ray spectrum of MGOF: Mn<sup>4+</sup> phosphor

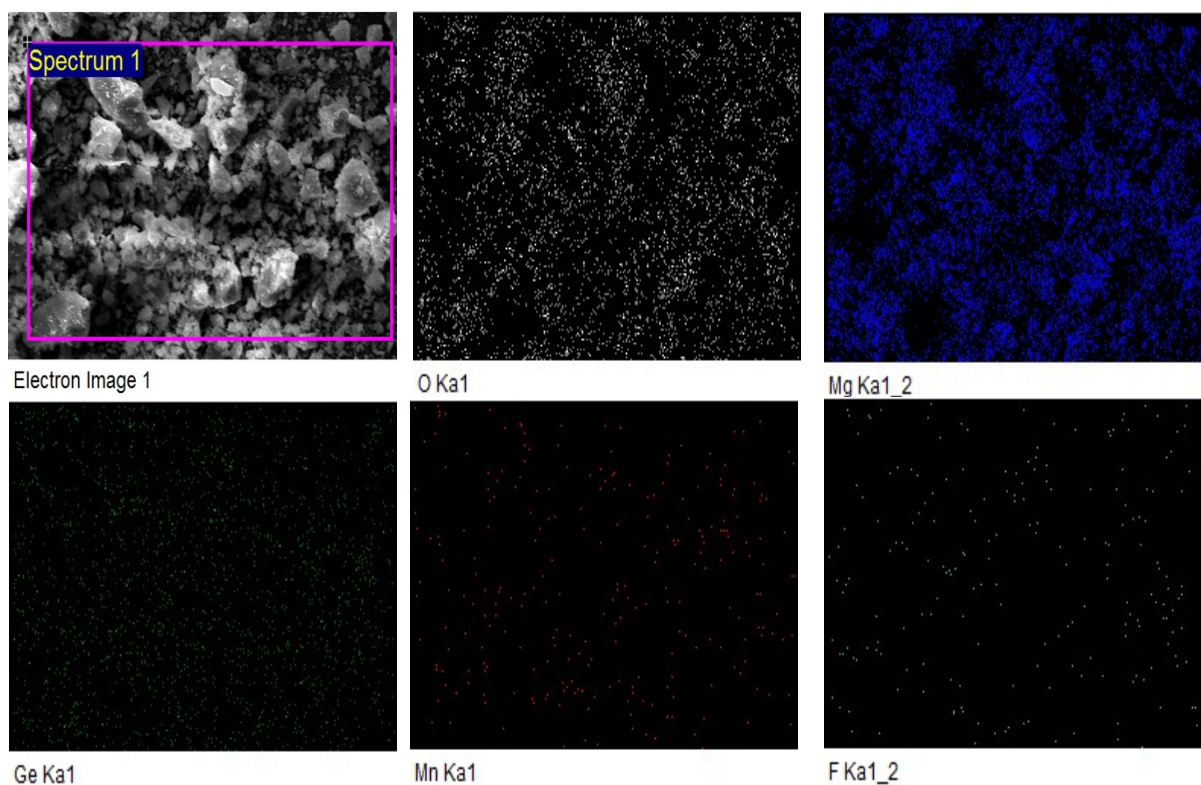

**Fig. S3** EDX elemental mapping of MGOF:  $Mn^{4+}$  phosphor

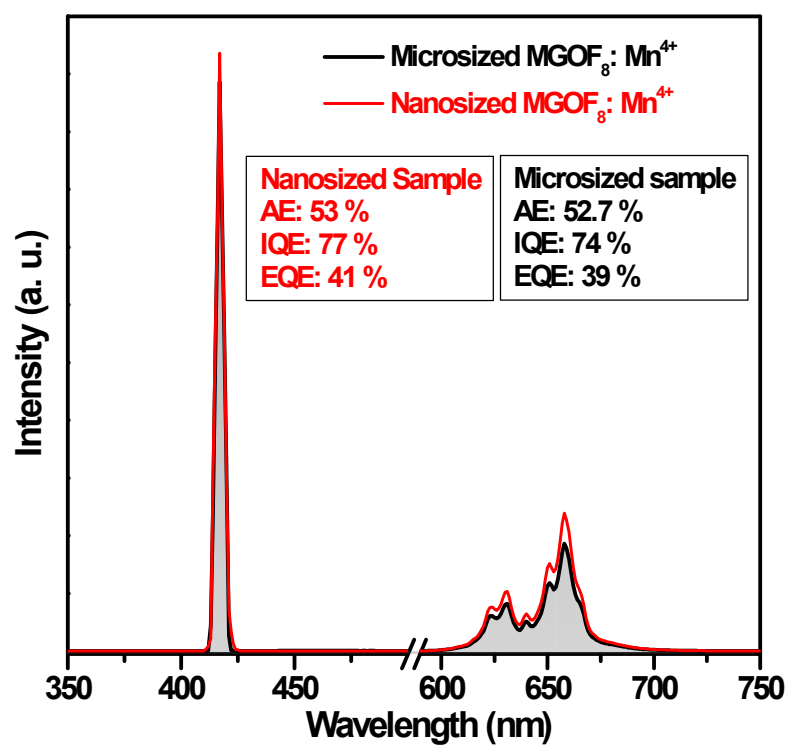

**Fig. S4** Comparative emission spectra of MGOF:  $Mn^{4+}$  nanophosphor and solid-state synthesized MGOF:  $Mn^{4+}$  microsized phosphor for calculating the blue absorption efficiency and PL quantum efficiencies.

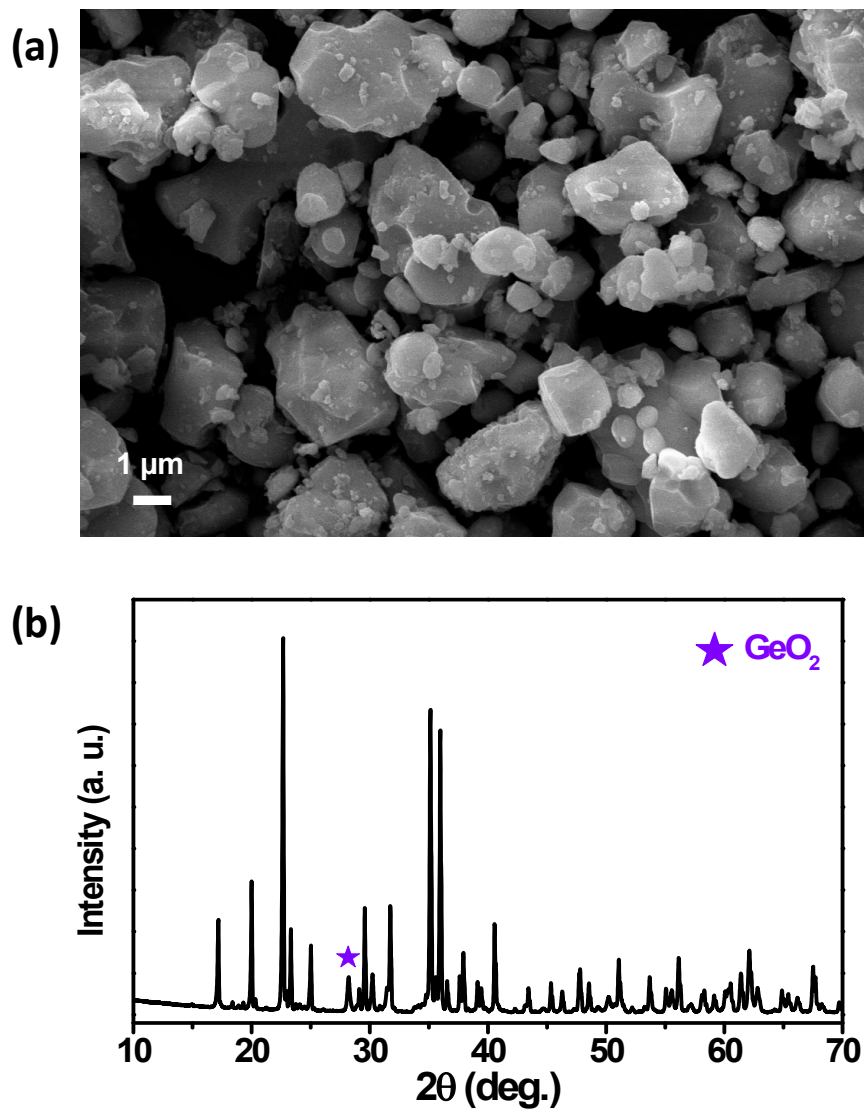

**Fig. S5** (a) SEM and (b) XRD of solid state synthesized MGOF:Mn<sup>4+</sup> microsized phosphor.

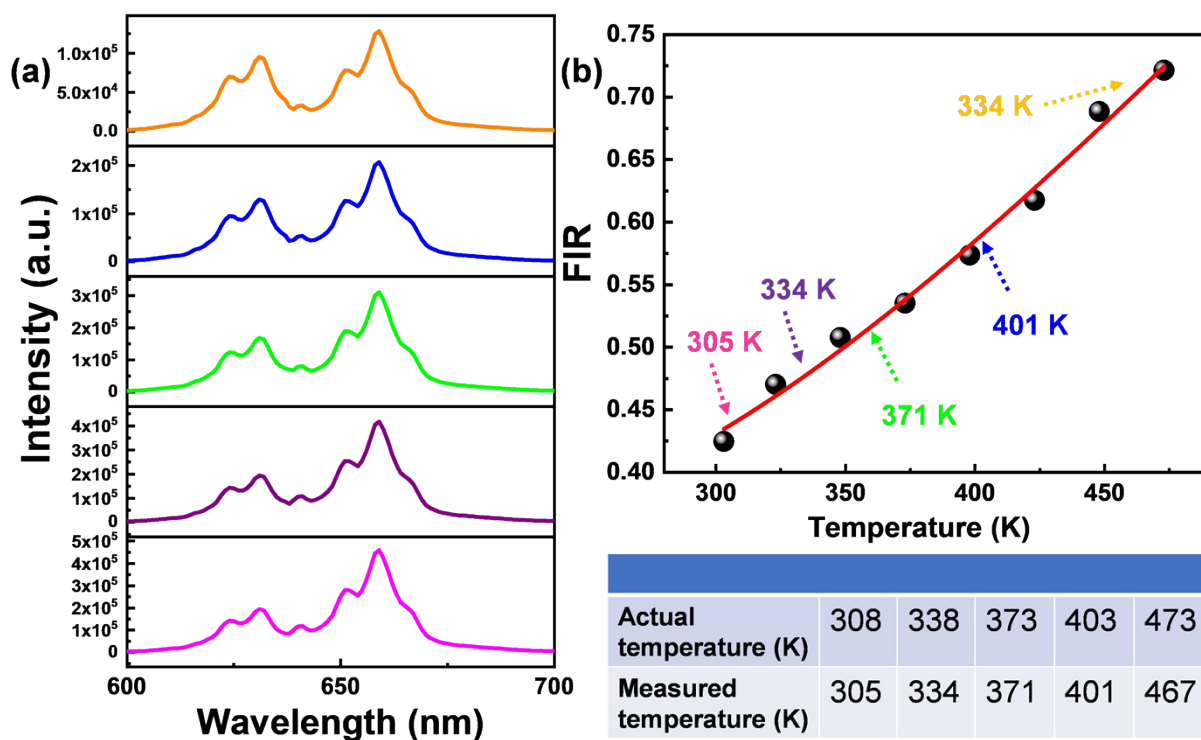

*Fig. S6 (a) The luminescence spectra recorded at different random temperatures, (b) the FIR plot for comparing the calculated temperature with the actual temperature.*

**Table S1** The atomic coordinate positions and the fraction of occupancy for the MGOF:

*Mn<sup>4+</sup> nanophosphor.*

| Atoms | Name | x        | y        | z       | Occupancy | U <sub>iso</sub> |
|-------|------|----------|----------|---------|-----------|------------------|
| Mg    | Mg1  | 0.00000  | 0.50000  | 0.50000 | 1.0000    | 0.00907          |
| Mg    | Mg2  | 0.00000  | 0.00000  | 0.50000 | 1.0000    | 0.09849          |
| Mg    | Mg3  | 0.17570  | 0.17810  | 0.00000 | 1.0000    | 0.00600          |
| Mg    | Mg4  | 0.32600  | 0.14630  | 0.50000 | 1.0000    | 0.03931          |
| Mg    | Mg5  | -0.00440 | 0.25170  | 0.24230 | 1.0000    | 0.02029          |
| Mg    | Mg6  | 0.33160  | 0.41900  | 0.24610 | 1.0000    | 0.04218          |
| Ge    | Ge1  | 0.00000  | 0.00000  | 0.00000 | 0.9900    | 0.00482          |
| Mn    | Mn   | 0.00000  | 0.00000  | 0.00000 | 0.0100    | 0.01000          |
| Ge    | Ge2  | 0.12560  | 0.50160  | 0.00000 | 1.0000    | 0.00433          |
| Ge    | Ge3  | 0.18369  | 0.32025  | 0.50000 | 0.5540    | 0.00600          |
| O     | O1   | 0.08482  | 0.33462  | 0.00000 | 1.0000    | 0.08267          |
| O     | O2   | 0.42180  | 0.34810  | 0.00000 | 1.0000    | 0.12093          |
| O     | O3   | 0.25180  | 0.00310  | 0.00000 | 1.0000    | 0.02806          |
| O     | O4   | 0.07096  | 0.32890  | 0.50000 | 0.8536    | 0.00500          |
| F     | F4   | 0.07096  | 0.32890  | 0.50000 | 0.1464    | 0.50732          |
| O     | O5   | 0.41310  | 0.33140  | 0.50000 | 1.0000    | 0.00733          |
| O     | O6   | 0.26664  | -0.02396 | 0.50000 | 0.2631    | 0.00633          |
| F     | F6   | 0.26664  | -0.02396 | 0.50000 | 0.7369    | 0.00633          |
| O     | O7   | 0.07560  | 0.07740  | 0.22350 | 1.0000    | 0.14939          |
| O     | O8   | 0.41450  | 0.08120  | 0.24850 | 1.0000    | 0.10490          |
| O     | O9   | 0.24062  | 0.25609  | 0.29283 | 0.5504    | 0.17196          |
| F     | F9   | 0.24062  | 0.25609  | 0.29283 | 0.4496    | 0.17196          |
